# Supplementary material for: Next-generation sequencing-based genomic profiling analysis reveals novel mutations for clinical diagnosis in Chinese primary epithelial ovarian cancer patients
Source: PubMed Central journal article supplement (PMC6381667; doi:10.1186/s13048-019-0494-4), 2019-02-20

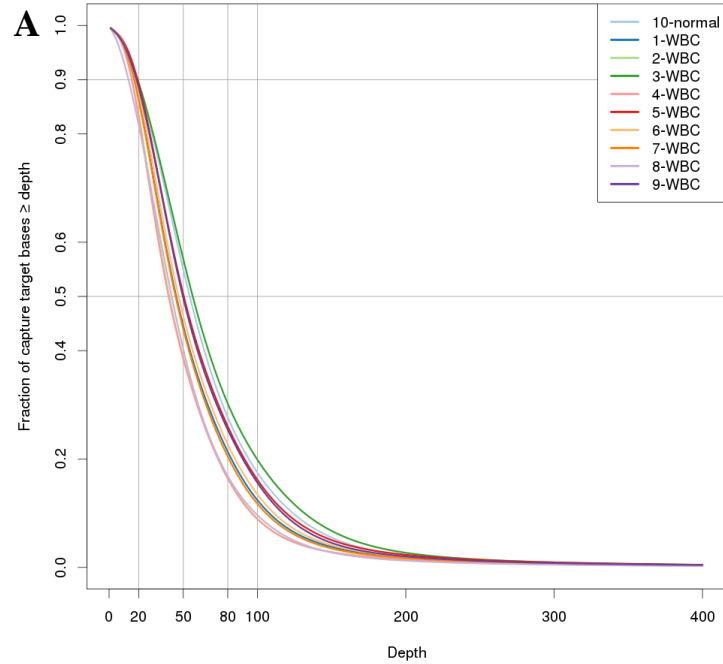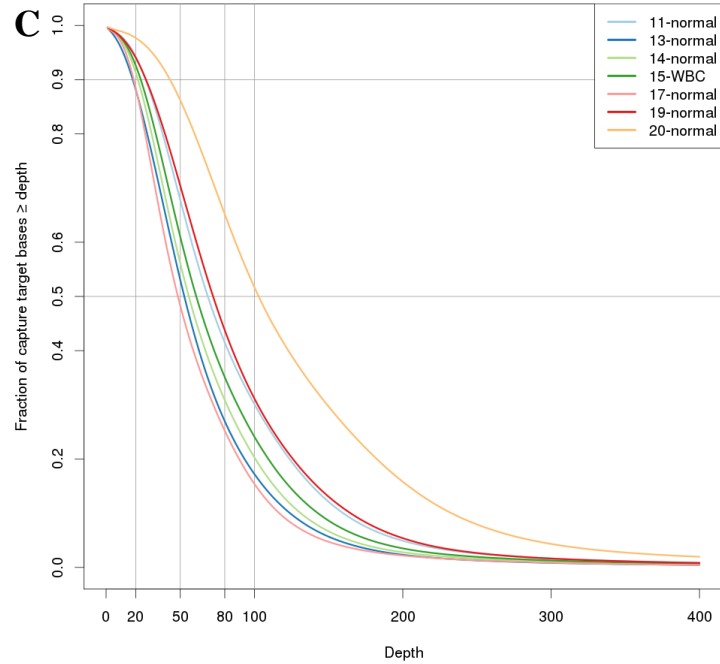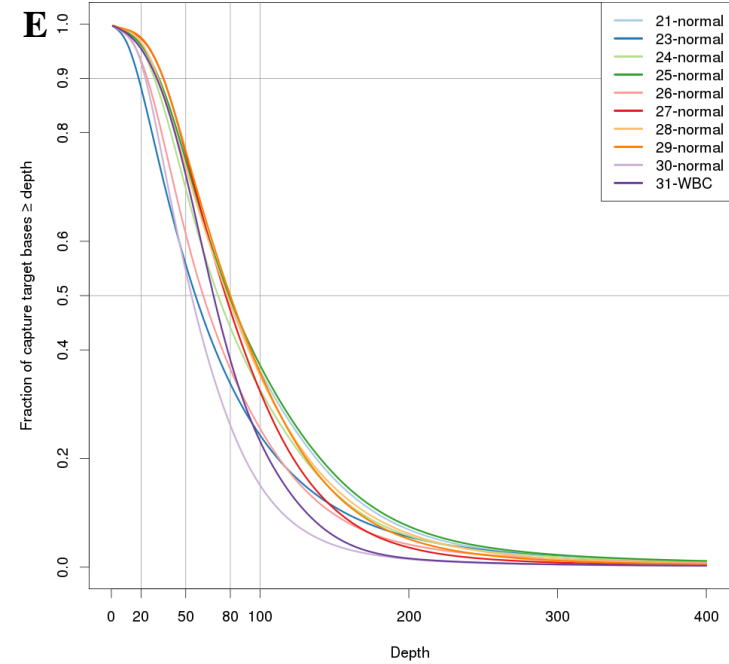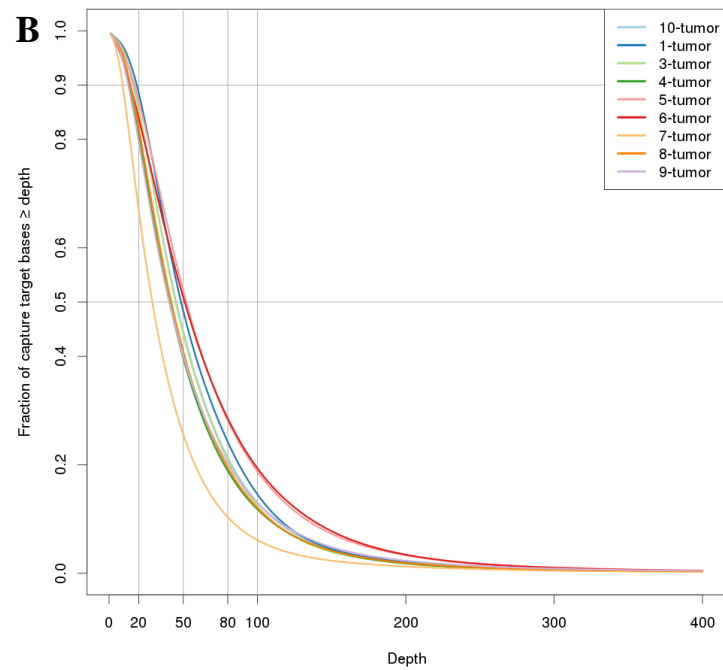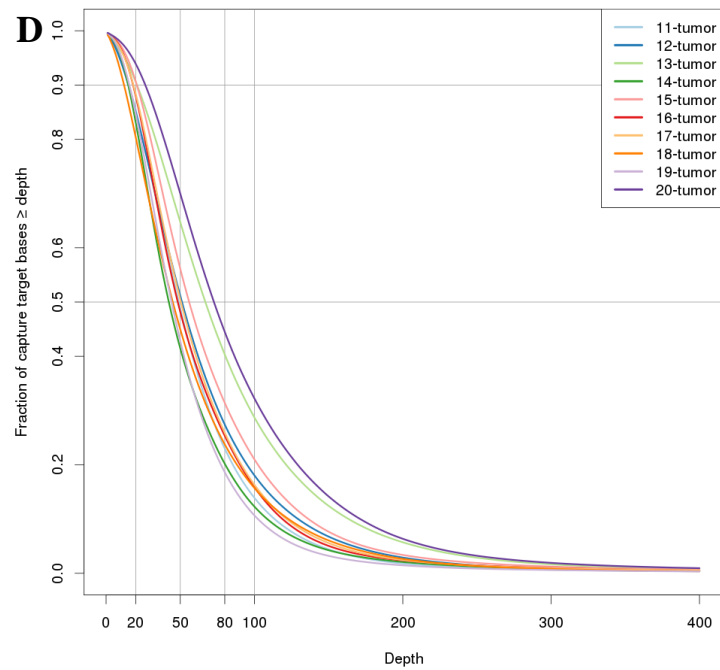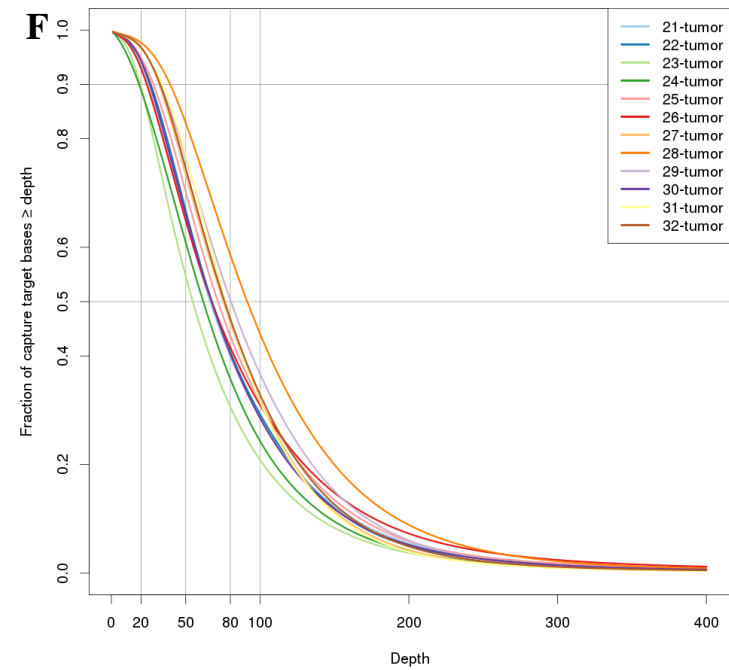

Supplement: 13048_2019_494_MOESM4_ESM.pdf [file 13048_2019_494_MOESM4_ESM.pdf]
