# Supplementary material for: Next-generation sequencing-based genomic profiling analysis reveals novel mutations for clinical diagnosis in Chinese primary epithelial ovarian cancer patients
Source: Springer Nature journal article supplement (doi:10.1186/s13048-019-0494-4), 2019-02-20
Supplement: MOESM1 [file 16495234]

**A**

| ID  | Chr   | Position | Ref | Alt | Mutation Annotation                   | Sanger Sequencing    |
|-----|-------|----------|-----|-----|---------------------------------------|----------------------|
| YXZ | chr17 | 39324333 | T   | A   | KRTAP4-3(NM_033187):c.A92T:p.Q31L     | Sequeucencing failed |
| SMF | chr17 | 7578508  | C   | T   | TP53(NM_001126115):c.G26A:p.C9Y       | <b>Validated</b>     |
| SMF | chr17 | 18682505 | T   | C   | FBXW10(NM_001267586):c.T2894C:p.V965A | <b>Validated</b>     |
| SMF | chr19 | 58385748 | G   | A   | ZNF814(NM_001144989):c.C1010T:p.A337V | Sequeucencing failed |
| QLF | chr17 | 7577539  | G   | A   | TP53(NM_001126115):c.C346T:p.R116W    | <b>Validated</b>     |
| YHA | chr17 | 7577120  | C   | T   | TP53(NM_001126115):c.G422A:p.R141H    | <b>Validated</b>     |
| GMY | chr17 | 7578536  | T   | C   | TP53(NM_001126118):c.A277G:p.K93E     | <b>Validated</b>     |
| DYM | chr17 | 7577121  | G   | A   | TP53(NM_001126115):c.C421T:p.R141C    | <b>Validated</b>     |
| ZLF | chr17 | 7573991  | C   | A   | TP53(NM_001126115):c.G640T:p.E214X    | Sequeucencing failed |
| JXX | chr17 | 7577534  | C   | A   | TP53(NM_001126115):c.G351T:p.R117S    | Sequeucencing failed |
| LGZ | chr17 | 7578265  | A   | T   | TP53(NM_001126115):c.T188A:p.I63N     | <b>Validated</b>     |

**B**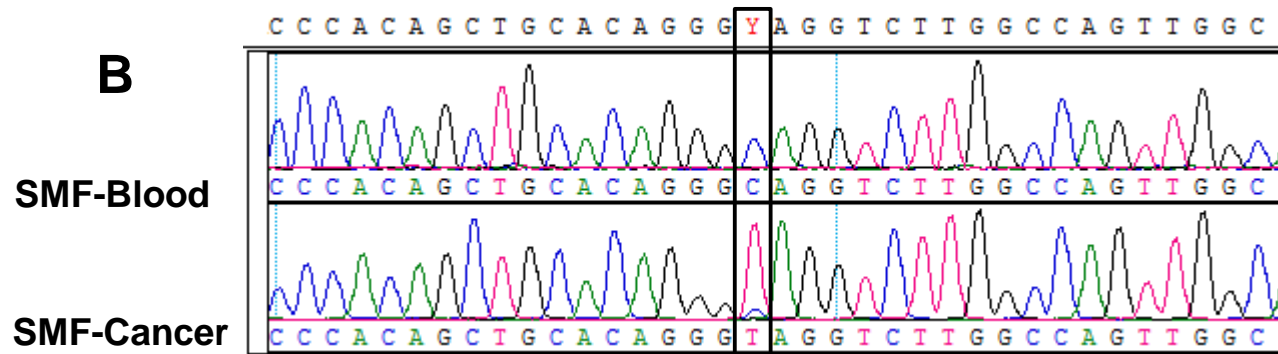

Chr17:7578508:C&gt;T, TP53 (NM\_001126115):c.G26A:p.C9Y

**C**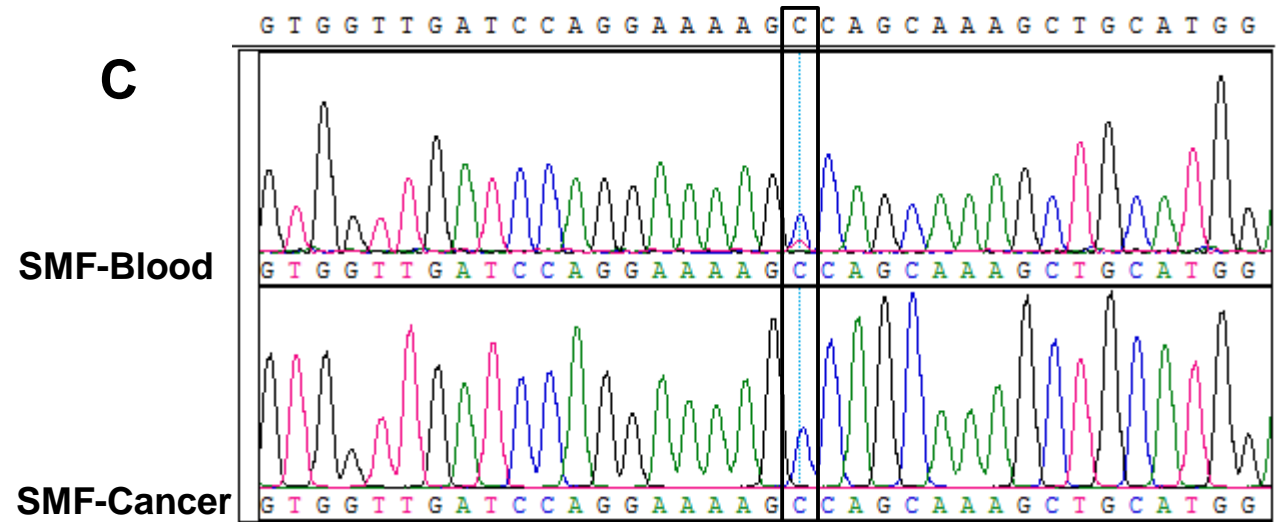Chr17:18682505:T>C, *FBXW10* (NM\_001267586):c.T2894C:p.V965A**D**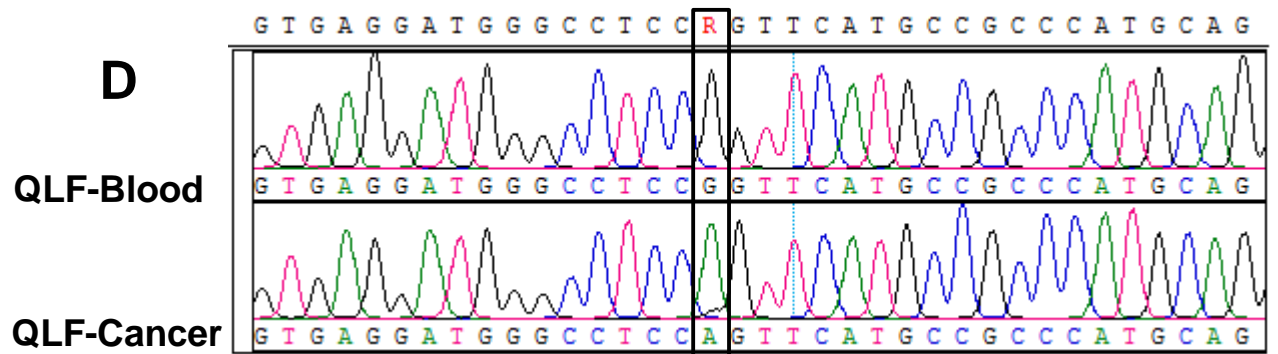

Chr17:7577539:G&gt;A, TP53 (NM\_001126115):c.C346T:p.R116W

**E**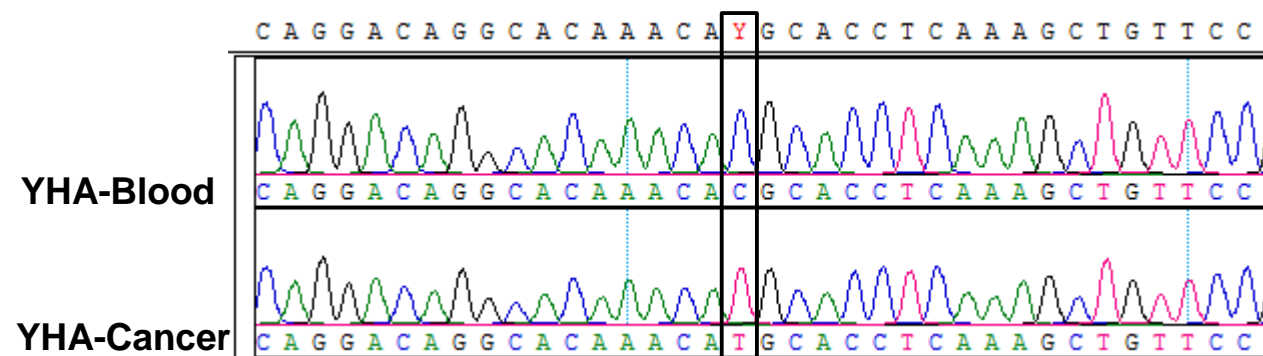

Chr17:7577120:C&gt;T, TP53(NM\_001126115):c.G422A:p.R141H

**F**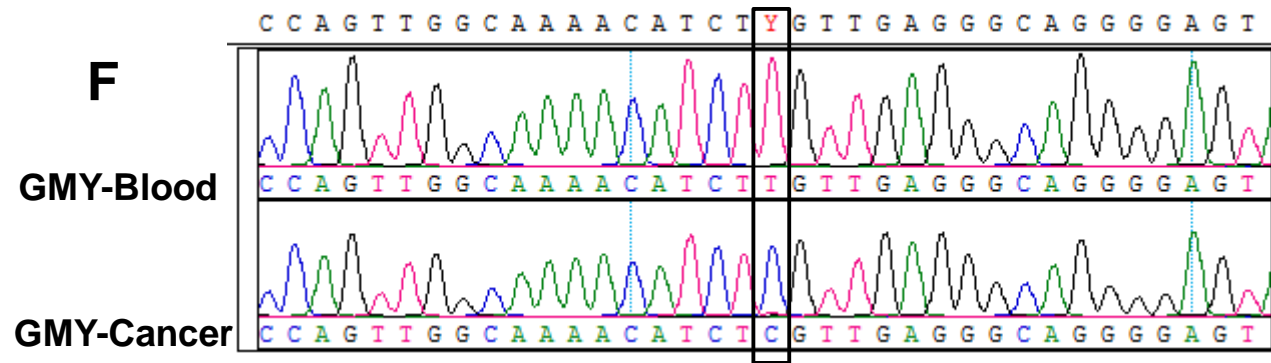

Chr17:7578536:T&gt;C, TP53(NM\_001126118):c.A277G:p.K93E

**G**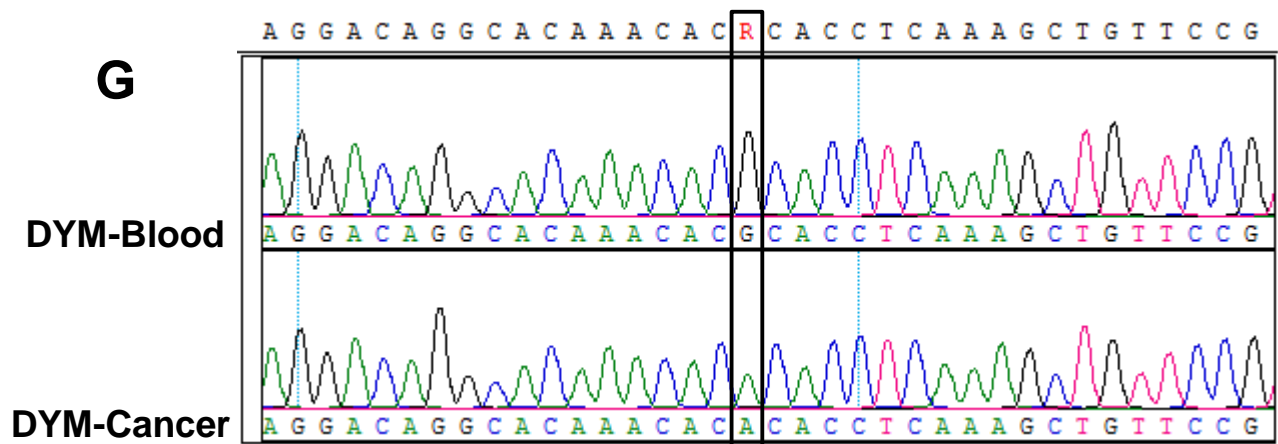

Chr17:7577121:G&gt;A, TP53(NM\_001126115):c.C421T:p.R141C

**H**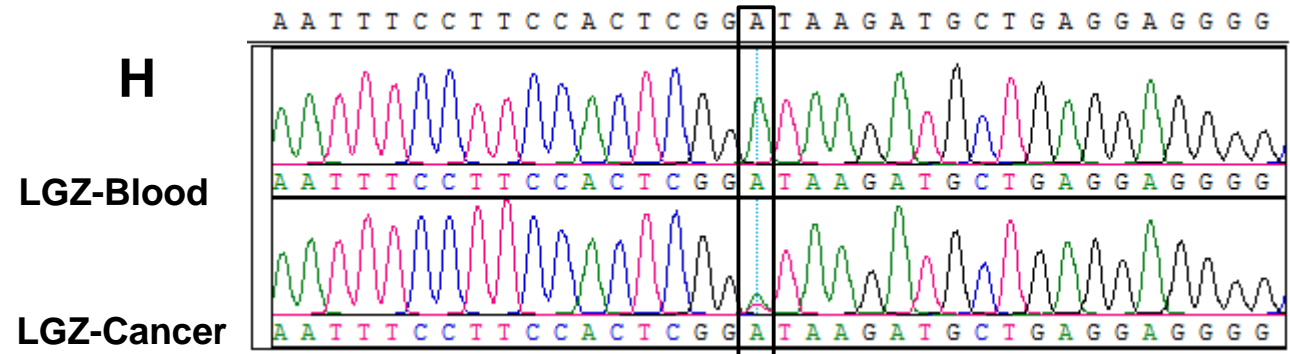

Chr17:7578265:A&gt;T, TP53 (NM\_001126115):c.T188A:p.I63N
